# Supplementary material for: Fusion Protein Vaccine Based on Ag85B and STEAP1 Induces a Protective Immune Response against Prostate Cancer
Source: MDPI journal article supplement (doi:10.3390/vaccines9070786), 2021-07-13
Supplement: s1 [file s1]

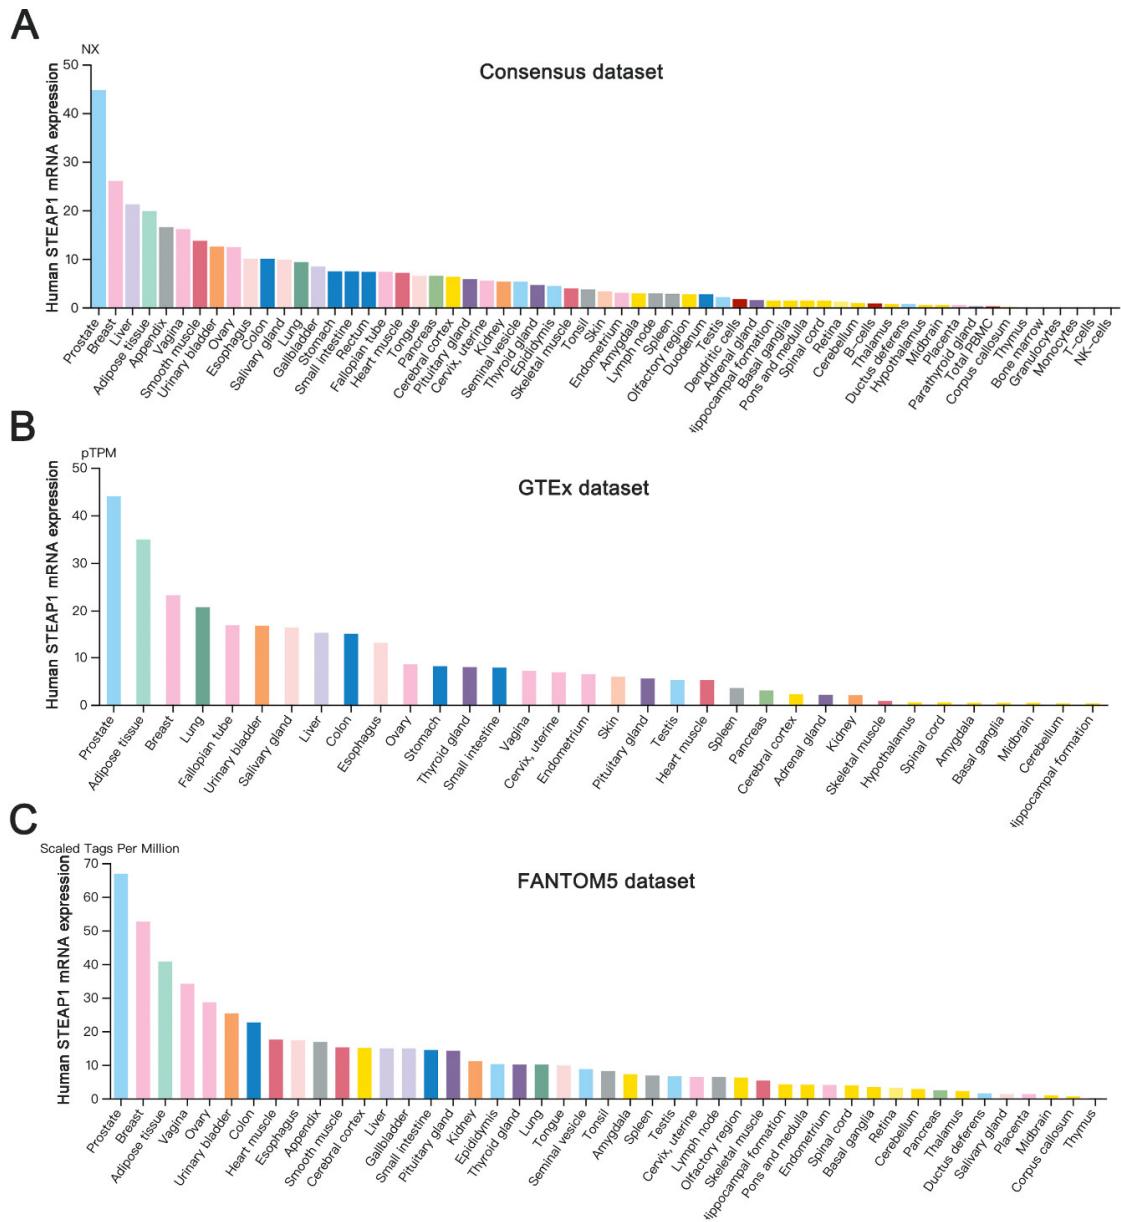

**Figure S1.** Human STEAP1 expression level in The Human Protein Atlas database. (A) Human STEAP1 expression level in consensus dataset of The Human Protein Atlas database. (B) Human STEAP1 expression level in GTEx dataset of The Human Protein Atlas database. (C) Human STEAP1 expression level in FANTOM5 dataset of The Human Protein Atlas database.

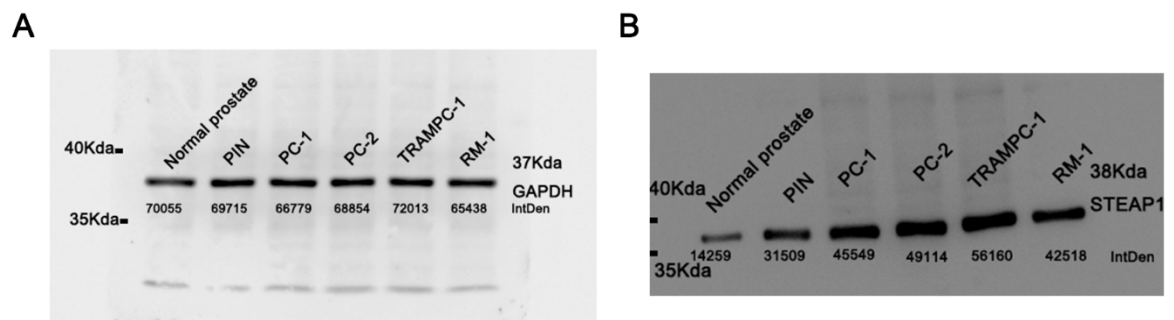

**Figure S2.** Whole and uncropped western blots. (A) western blot of GAPDH for Figure 1C. (B) western blot of STEAP1 for Figure 1C. IntDen: Integrated density.
